# Supplementary material
Source: PubMed Central journal article supplement (PMC4980260)

## SUPPLEMENTARY INFORMATION

Extended Data Figure 2b

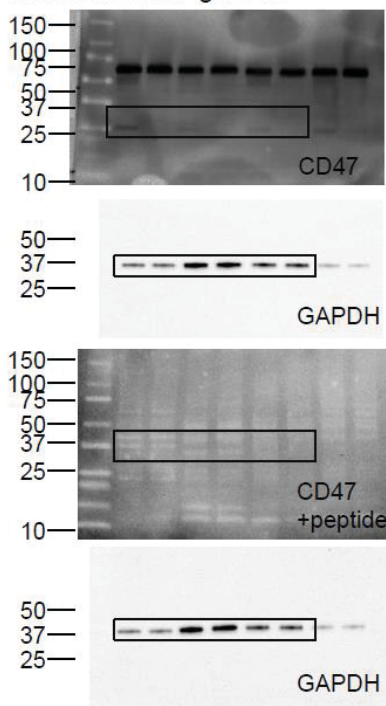

Extended Data Figure 6d

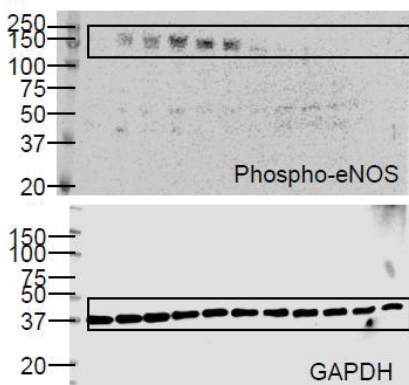

Extended Data Figure 7g

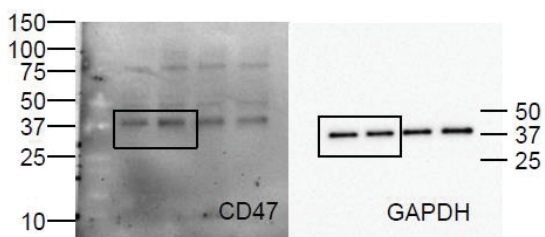

Extended Data Figure 6c

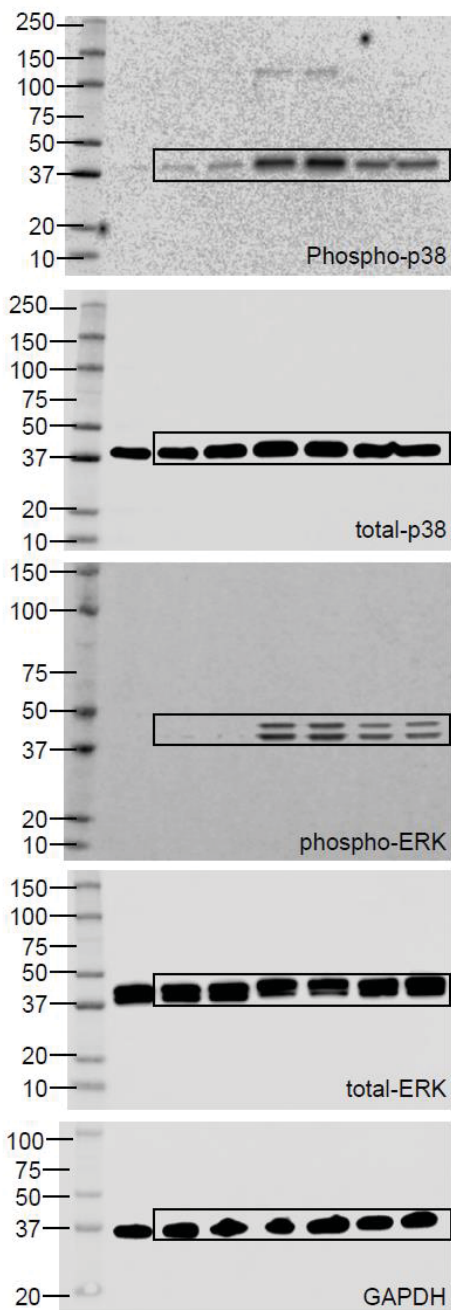

Supplement: NIHMS796566-supplement-sourcedata.pdf [file NIHMS796566-supplement-sourcedata.pdf]
